# Supplementary material
Source: publisher site journal article supplement (https://www.dovepress.com/article/378768)

Supplementary S1 Comparison of preoperative SII values between presence and absence of LVI in distinct stages UTUC (B). SII: systemic immune-inflammation index; LVI: lymphovascular invasion. The *p*-values (< 0.05) indicate statistical significance.


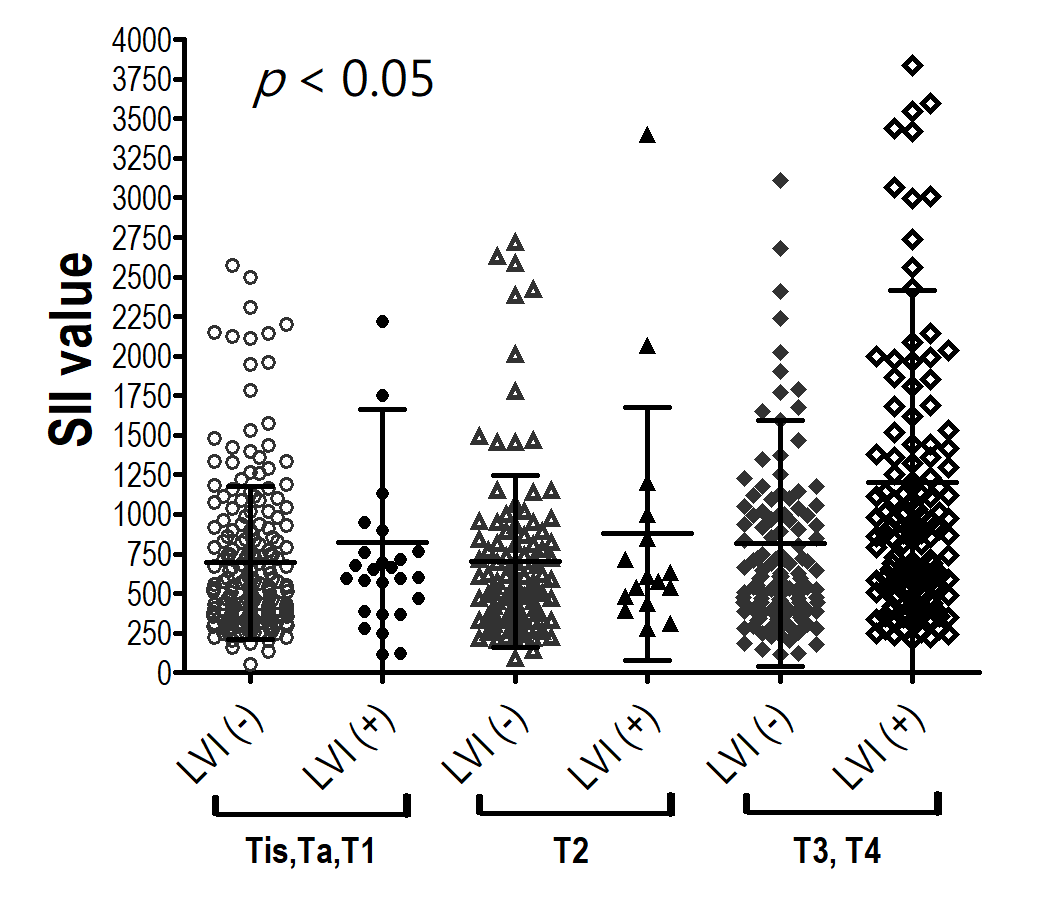


Supplementary S2 Kaplan-Meier survival curves for overall survival (A), cancer-specific survival (B), and progression-free survival (C) according to the presence and absence of LVI in UTUC patients. LVI: lymphovascular invasion; UTUC: upper tract urothelial carcinoma. The P-values (< 0.05) indicate statistical significance.


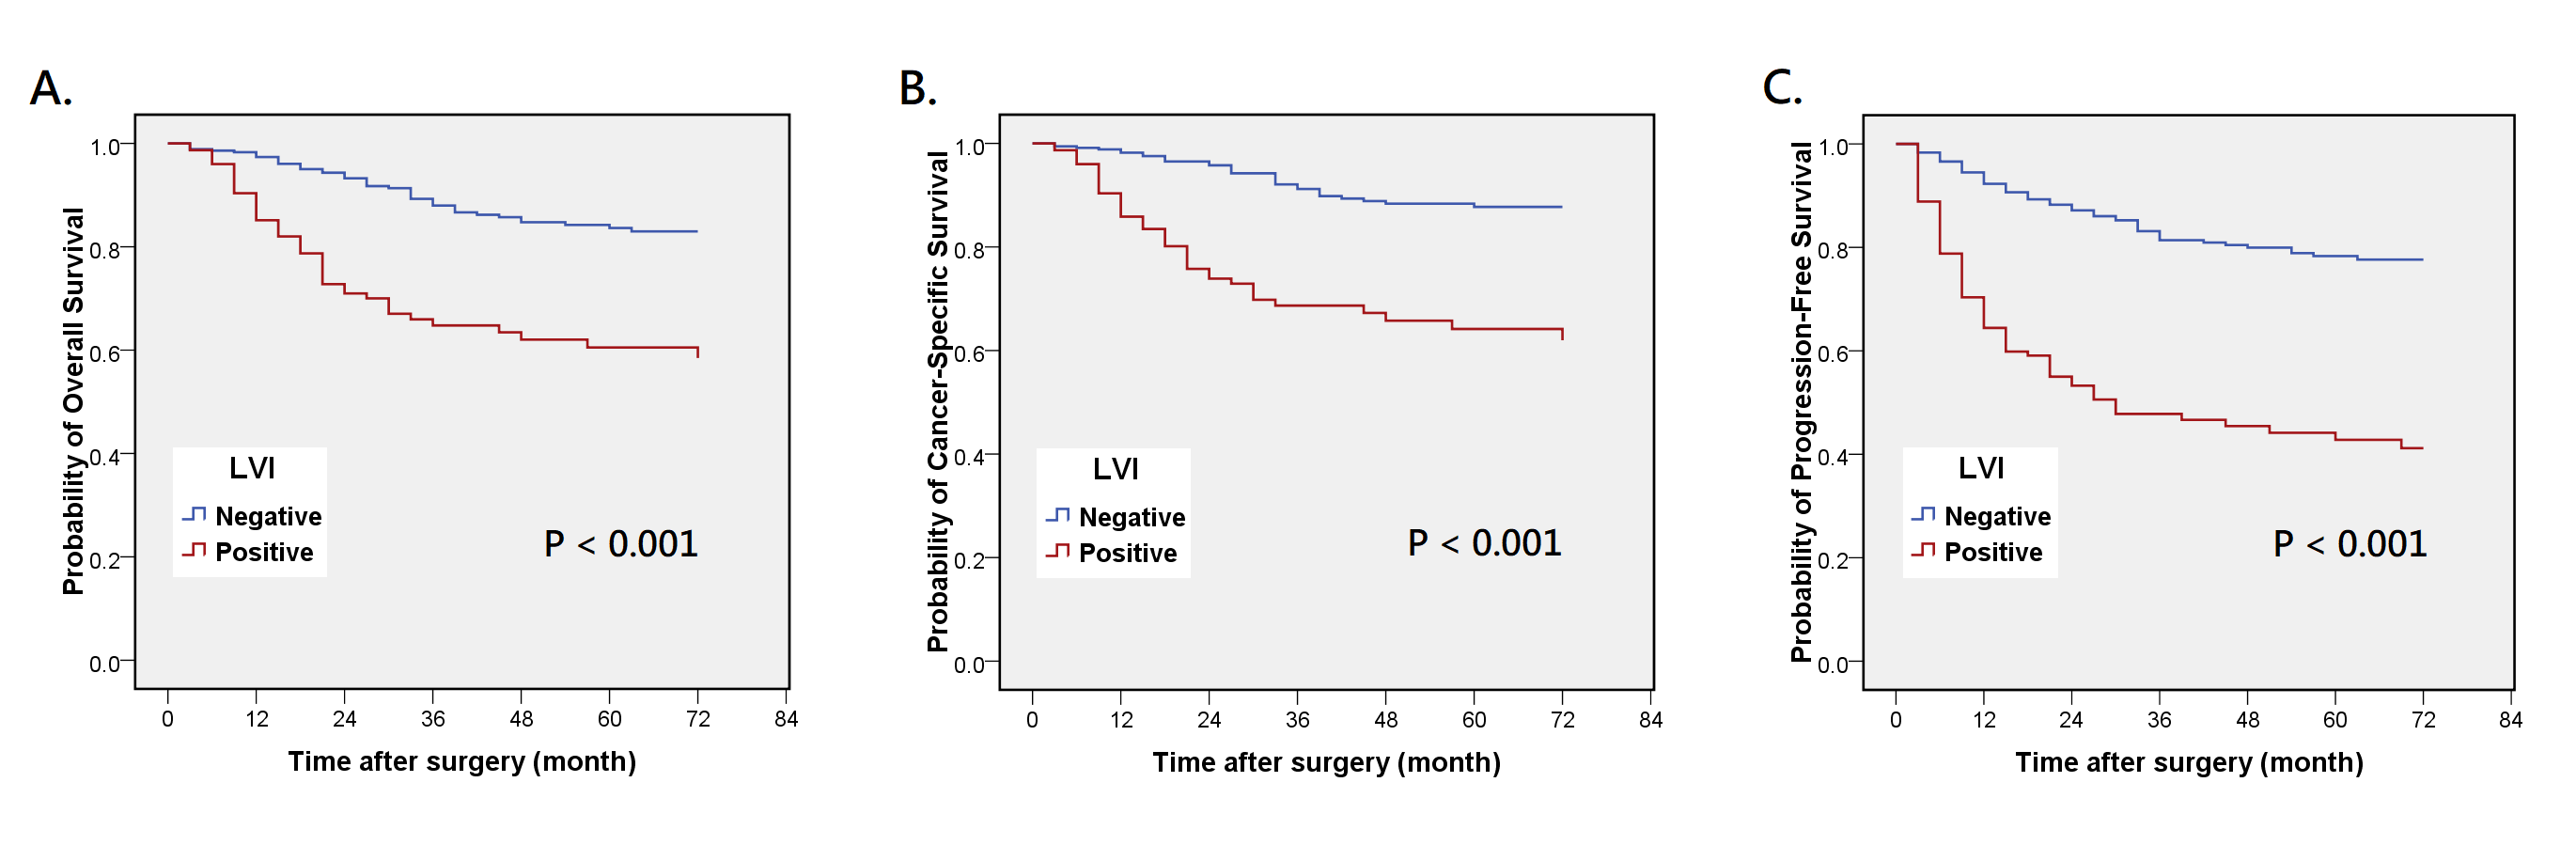


Supplementary S3 Kaplan-Meier survival curves for overall survival (A), cancer-specific survival (B), and progression-free survival (C) according to low- and high-level SII in UTUC patients. SII: systemic immune-inflammation index; UTUC: upper tract urothelial carcinoma. The P-values (< 0.05) indicate statistical significance.


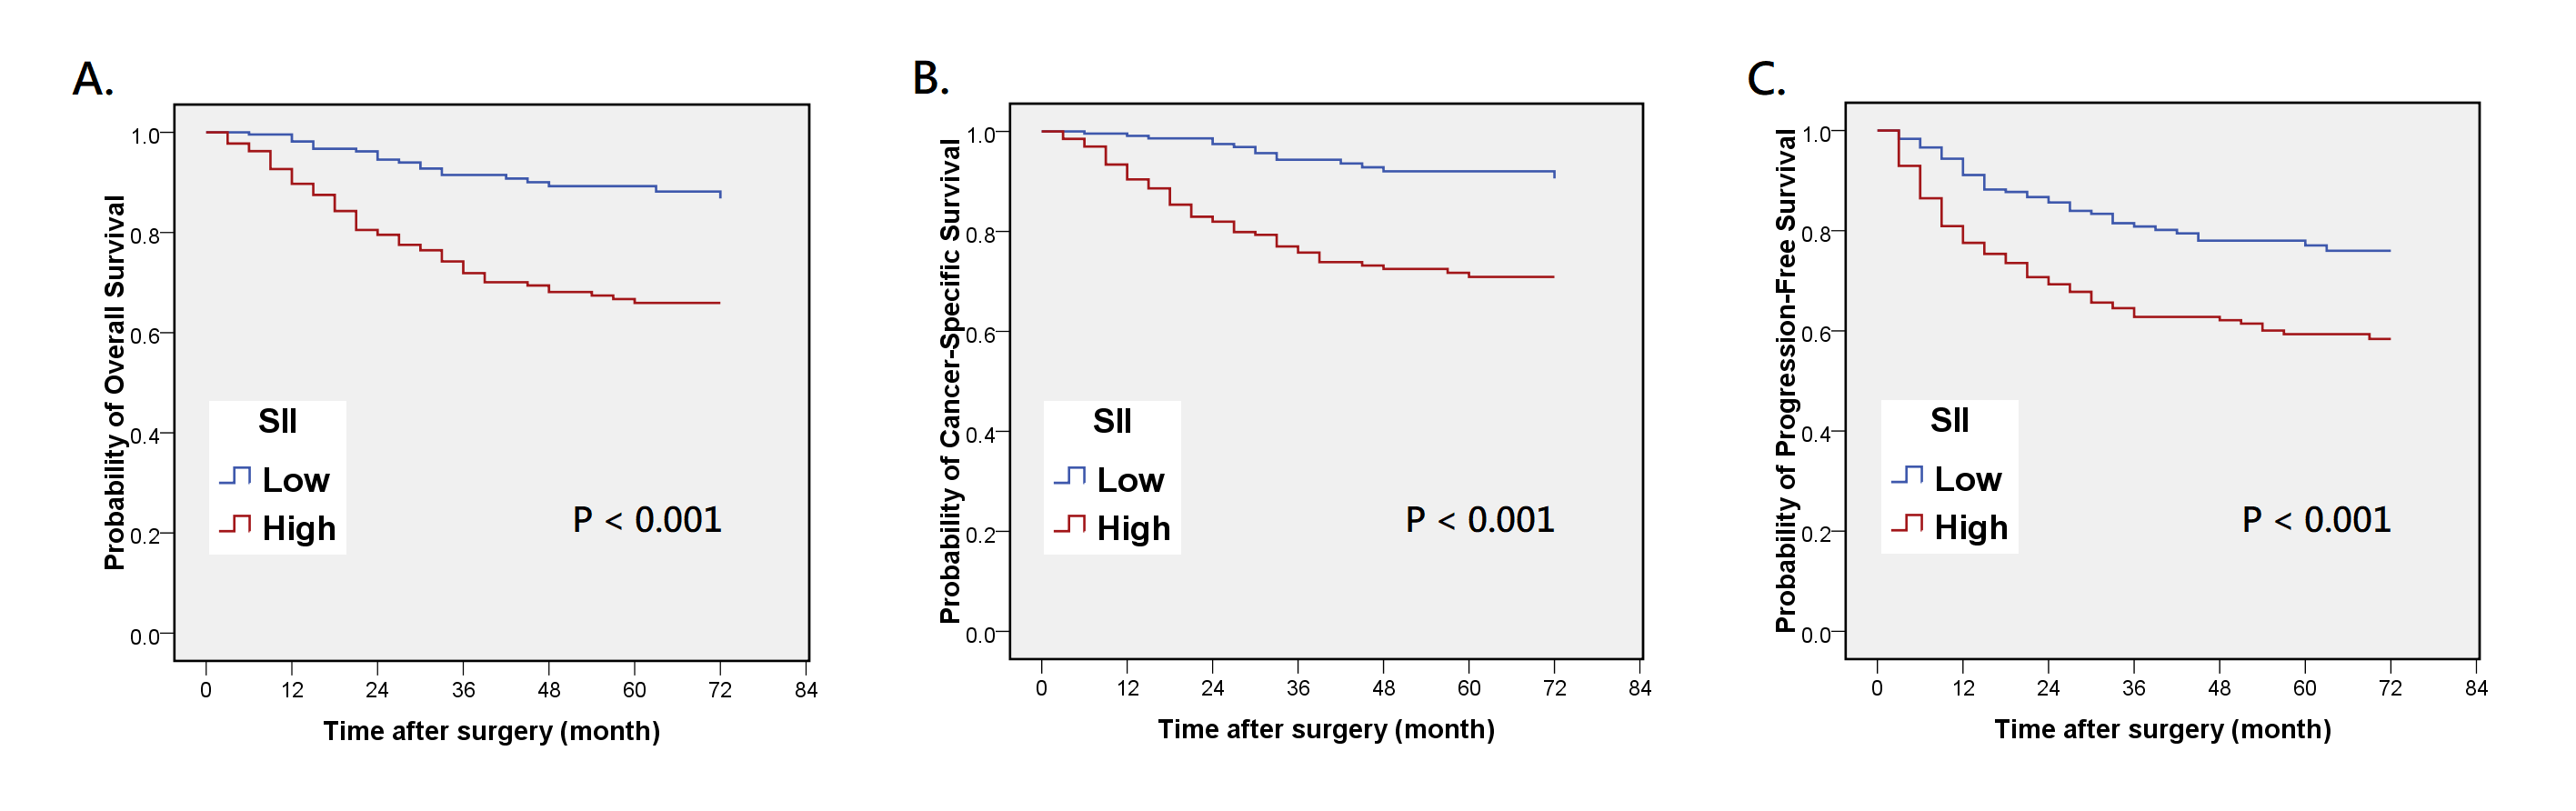

Supplement: Supplementary file 1 [file get_supplementary_file.php]
